# Supplementary material
Source: HighWire-hosted journal article supplement (https://erj.ersjournals.com/content/52/6/1801218)
Supplement: inline-supplementary-material-1 [file inline-supplementary-material-1.pdf]

# Estimating the prevalence of latent tuberculosis in a low incidence setting: Australia

*Dale, K.D.<sup>1</sup>, Trauer, J.M.<sup>1,2</sup>, Dodd, P.J.<sup>3</sup>, Houben, R.M.G.J.<sup>4,5</sup>, Denholm, J.T.<sup>1,6</sup>*

<sup>1</sup>Victorian Tuberculosis Program, Melbourne Health, Victoria, Australia

<sup>2</sup> School of Public Health and Preventive Medicine, Monash University, Victoria, Australia

<sup>3</sup> School of Health and Related Research, University of Sheffield, Sheffield, United Kingdom

<sup>4</sup> TB Modelling Group, TB Centre, London School of Hygiene and Tropical Medicine, London, United Kingdom,

<sup>5</sup> Department of Infectious Disease Epidemiology, London School of Hygiene and Tropical Medicine, London, United Kingdom,

<sup>6</sup> Department of Microbiology and Immunology, The University of Melbourne, Victoria, Australia

Corresponding author:           Katie Dale  
  
                                          Victorian Tuberculosis Program, Peter Doherty Institute  
  
                                          Level 5, 792 Elizabeth St  
  
                                          Melbourne VIC 3000  
  
                                          Phone: 0417 543 713  
  
                                          Fax: 8344 0781  
  
                                          Email: [katie.dale@mh.org.au](mailto:katie.dale@mh.org.au)

**“Take home” message: Migration is a key driver of tuberculosis (TB) in many low incidence settings. Our method combines global TB infection estimates with migration data to provide useful insights into the prevalence of latent TB in a low-incidence setting, Australia.**

## Appendices

The probabilities of infection in the Australian-born ( $p_a$ ) and in the overseas-born ( $p_o$ ) are given by:

$$p_a = 1 - e^{-H_a}$$

$$p_o = 1 - e^{-H_o}$$

$$H_a = \frac{1}{2}FOI_{ba} + \sum_{i=b+1}^f FOI_{ia}$$

$$H_o = \frac{1}{2}FOI_{bs} + \sum_{i=b+1}^{m-1} FOI_{is} + \frac{1}{2}FOI_{ms} + \frac{1}{2}FOI_{ma} + \sum_{i=m+1}^f FOI_{ia}$$

Where FOI indicates the force of infection that an Australian-born ( $a$ ) or overseas-born ( $o$ ) person was exposed to in a specific year and country, and  $H$  indicates the cumulative force of infection. The subscripts  $a$ ,  $b$ ,  $m$ ,  $s$  and  $f$  refer to Australia, birth year, migration year, source country and final year of calculation respectively, and are applied to forces of infection in specific years and countries.

a)

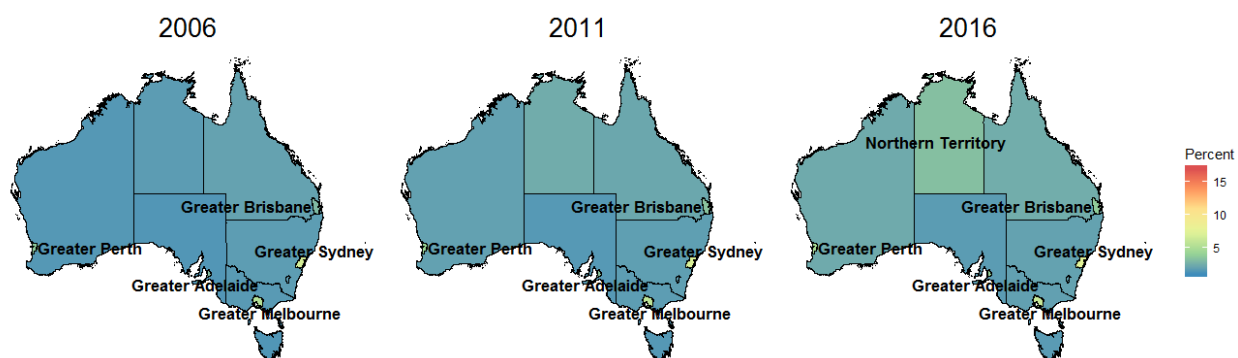

b)

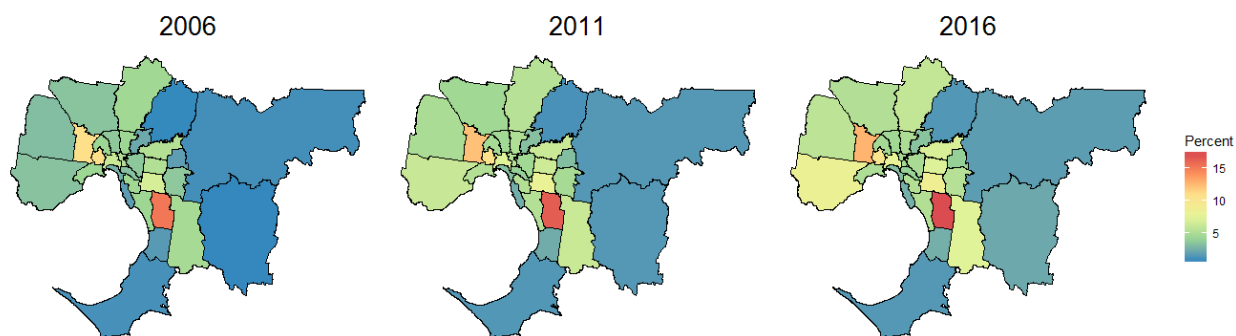

Figure S1 Estimated percentage of residents with LTBI in Australia over time by a) region of Australia and b) local government area in Greater Melbourne.
